# Supplementary material
Source: PubMed Central journal article supplement (PMC9481717)
Supplement: NIHMS1824688-supplement-1.pdf [file NIHMS1824688-supplement-1.pdf]

A

**Genetic****Pharmacological**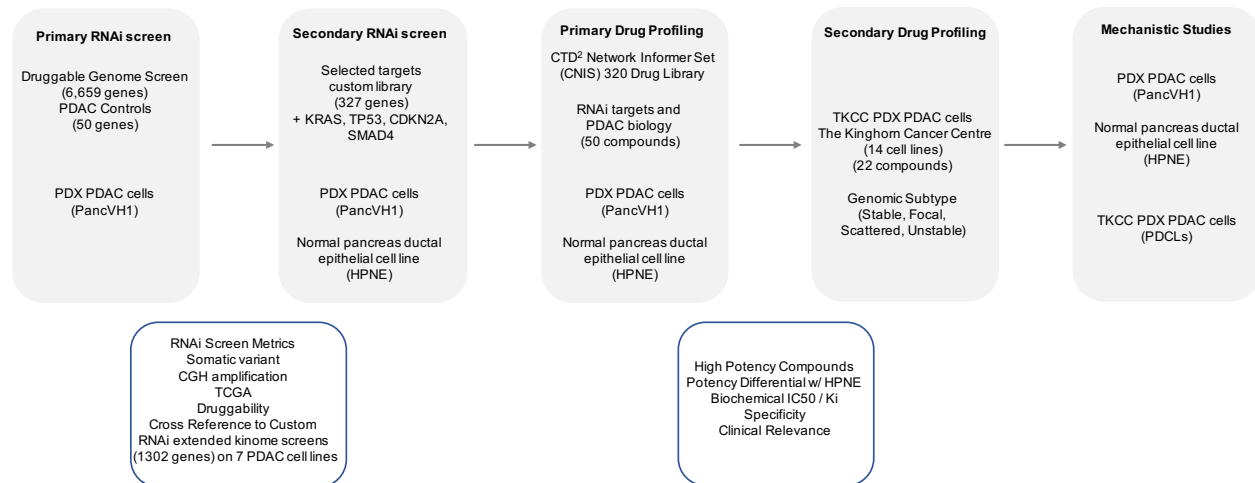

B

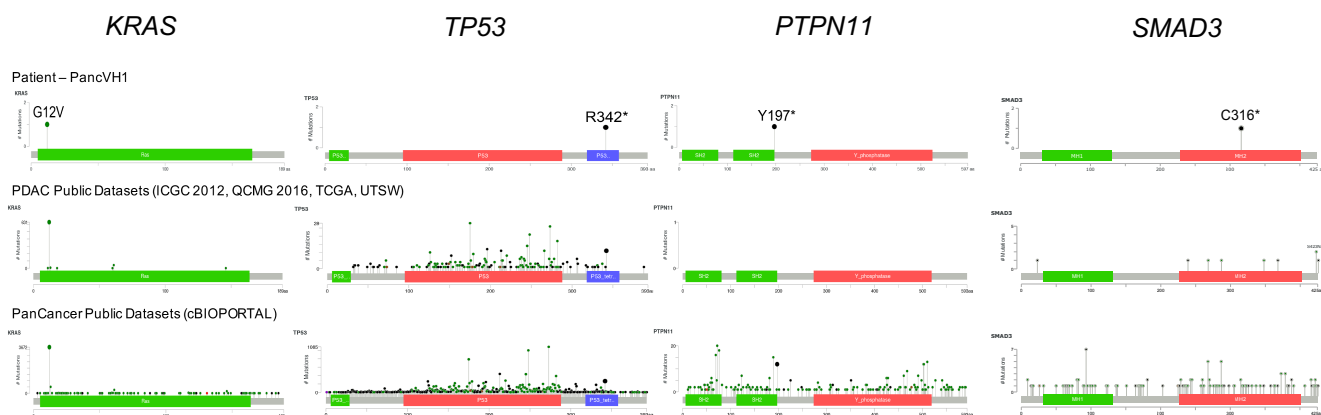

C

| Variant Type          | Number of Variants | Percentage |
|-----------------------|--------------------|------------|
| Missense and Nonsense | 117                | 26.9       |
| Coding Synonymous     | 48                 | 11         |
| Intronic              | 182                | 41.8       |
| Intergenic            | 63                 | 14.5       |
| 5' and 3' UTRs        | 19                 | 4.4        |
| Indels (CCDS)         | 9                  | 2.1        |
| <b>Total</b>          | <b>438</b>         | <b>100</b> |

D

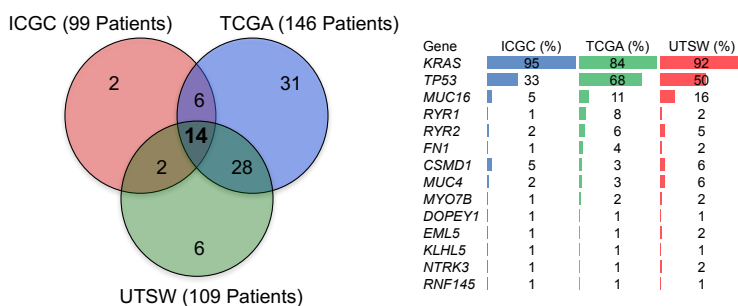

**Figure S1. Extended Data. A.** Schematic overview of functional genetic and pharmacological profiling performed in this study; blue outline boxes list criteria utilized to select targets and drugs for secondary screening efforts. **B.** cBioportal mutation mapper of driver mutations in PancVH1 whole exome sequencing (WES) results. **C.** WES variant type and prevalence. **D.** WES gene level shared variants in public datasets ICGC, TCGA, UTSW in cBioPortal.
