# Supplementary material
Source: PubMed Central journal article supplement (PMC9481717)
Supplement: NIHMS1824688-supplement-2.pdf [file NIHMS1824688-supplement-2.pdf]

A

## MISSION Sigma Druggable Genome RNAi Library

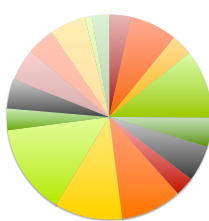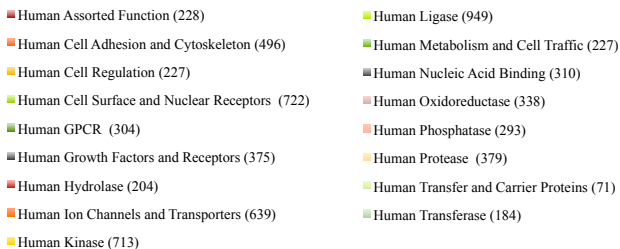

B

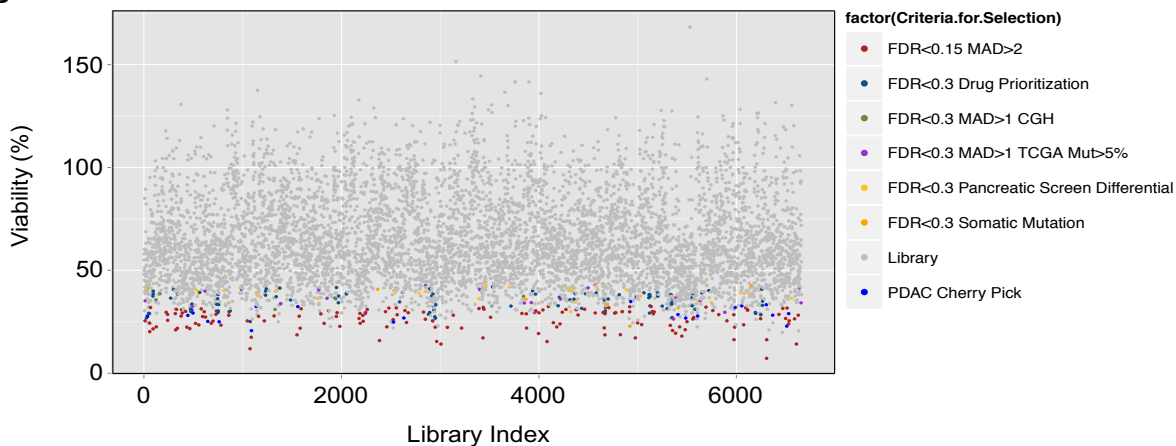

C

| RNAi Screen Metrics > Criteria     | Library based Scoring<br>FDR (q-value) | Plate based Scoring<br>Robust Z-score Threshold | Number of Genes |
|------------------------------------|----------------------------------------|-------------------------------------------------|-----------------|
| High Confidence Hits               | <0.15                                  | All 3 siRNA pooled replicates                   | 149             |
| PancVH1 Somatic Variants           | <0.3                                   |                                                 | 9               |
| PancVH1 CGH Amp                    | <0.3                                   | ≥ 2 siRNA pooled replicates                     | 6               |
| Drug Prioritization (IPA)          | <0.3                                   |                                                 | 91              |
| Pancreatic Cell Line Differentials | <0.3                                   |                                                 | 28              |
| TCGA Mutation >5% (Provisional)    | <0.3                                   | ≥ 2 siRNA pooled replicates                     | 21              |
| PDAC Cherry Pick                   |                                        |                                                 | 23              |
| <b>Total Selected</b>              |                                        |                                                 | <b>327</b>      |

D

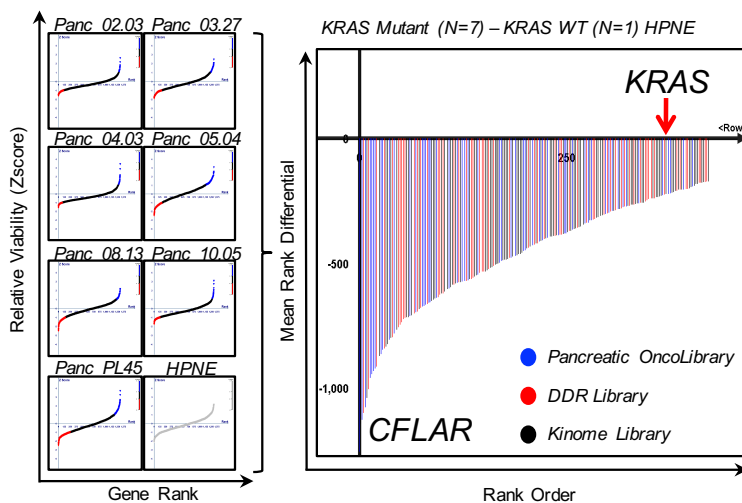

**Figure S2. Extended Data.** **A.** MISSION Sigma Druggable Genome RNAi Library. **B.** Druggable Genome RNAi Screen results displayed as percent viability (n=3 per data point, mean of three technical replicates (pooled siRNAs with 3 independent siRNAs per target) vs. whole library index (6659 genes) with hits and selection criteria depicted. **C.** Breakdown of Druggable Genome RNAi metrics criteria utilized for selection of targets. **D.** PDAC cell lines (JHU) RNAi Extended Kinome Screens mean gene target rank differentials (298 gene targets including KRAS) with HPNE cells utilized for hit selection; top differential gene target: CFLAR.
