# Supplementary material
Source: PubMed Central journal article supplement (PMC9481717)
Supplement: NIHMS1824688-supplement-4.pdf [file NIHMS1824688-supplement-4.pdf]

**A**

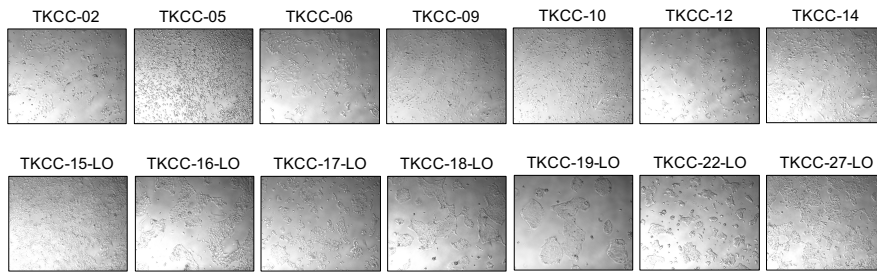

**B**

| Exponential growth equation | TKCC_02            | TKCC_05            | TKCC_06           | TKCC_09            | TKCC_10            | TKCC_12             | TKCC_15_LO         | TKCC_16_LO         | TKCC_17_LO       | TKCC_18_LO         | TKCC_22_LO        | TKCC_27_LO         | HPNE               |
|-----------------------------|--------------------|--------------------|-------------------|--------------------|--------------------|---------------------|--------------------|--------------------|------------------|--------------------|-------------------|--------------------|--------------------|
| Best-fit values             |                    |                    |                   |                    |                    |                     |                    |                    |                  |                    |                   |                    |                    |
| Y0                          | 0.7385             | 0.4415             | 0.7043            | 0.5673             | 0.5844             | 0.7877              | 0.5089             | 0.552              | 0.667            | 0.3918             | 0.48              | 0.6861             | 0.6246             |
| k                           | 0.01263            | 0.03407            | 0.0146            | 0.02361            | 0.02384            | 0.009445            | 0.0283             | 0.02477            | 0.01688          | 0.03058            | 0.03058           | 0.0157             | 0.01961            |
| Tau                         | 79.17              | 29.35              | 68.49             | 42.35              | 41.95              | 100.6               | 35.33              | 40.38              | 59.26            | 25.61              | 32.7              | 63.7               | 50.99              |
| Doubling Time               | 54.87              | 20.35              | 47.48             | 29.36              | 29.88              | 69.7                | 24.49              | 27.99              | 41.87            | 17.75              | 22.66             | 44.16              | 35.34              |
| Std. Error                  |                    |                    |                   |                    |                    |                     |                    |                    |                  |                    |                   |                    |                    |
| Y0                          | 0.01255            | 0.02371            | 0.03175           | 0.02083            | 0.02234            | 0.0163              | 0.0339             | 0.0251             | 0.02392          | 0.0338             | 0.02369           | 0.02544            | 0.0206             |
| k                           | 0.0002646          | 0.0007583          | 0.0006896         | 0.0005326          | 0.0005738          | 0.000313            | 0.0009554          | 0.0006568          | 0.0005392        | 0.00121            | 0.0007014         | 0.0005622          | 0.0004876          |
| 95% CI (profile likelihood) |                    |                    |                   |                    |                    |                     |                    |                    |                  |                    |                   |                    |                    |
| Y0                          | 0.7107 to 0.7687   | 0.3897 to 0.4954   | 0.6349 to 0.7793  | 0.5216 to 0.6144   | 0.5154 to 0.6149   | 0.7517 to 0.8243    | 0.4339 to 0.5843   | 0.497 to 0.6089    | 0.3145 to 0.721  | 0.319 to 0.4605    | 0.4292 to 0.5339  | 0.6303 to 0.7436   | 0.5793 to 0.671    |
| k                           | 0.01205 to 0.01323 | 0.02444 to 0.03582 | 0.0131 to 0.01617 | 0.02345 to 0.02483 | 0.02259 to 0.02515 | 0.009213 to 0.01098 | 0.02626 to 0.03063 | 0.02334 to 0.02628 | 0.0157 to 0.0181 | 0.03651 to 0.04193 | 0.02907 to 0.0302 | 0.01447 to 0.01698 | 0.01855 to 0.02072 |
| Tau                         | 75.61 to 83.01     | 27.91 to 30.83     | 61.83 to 76.36    | 40.28 to 44.54     | 39.76 to 44.27     | 93.55 to 108.5      | 32.75 to 38.08     | 38.06 to 42.84     | 55.24 to 63.71   | 23.85 to 27.39     | 31.05 to 34.4     | 58.9 to 68.11      | 48.26 to 53.92     |
| Doubling Time               | 52.41 to 57.54     | 19.35 to 21.37     | 42.86 to 52.93    | 27.82 to 30.88     | 27.56 to 30.69     | 64.84 to 75.24      | 22.7 to 26.39      | 26.38 to 29.69     | 38.29 to 44.16   | 16.53 to 18.99     | 21.83 to 23.84    | 40.83 to 47.91     | 33.45 to 37.37     |
| Goodness of Fit             |                    |                    |                   |                    |                    |                     |                    |                    |                  |                    |                   |                    |                    |
| Degrees of Freedom          | 10                 | 10                 | 10                | 10                 | 10                 | 10                  | 10                 | 10                 | 10               | 10                 | 10                | 10                 | 10                 |
| R square                    | 0.9964             | 0.9985             | 0.9832            | 0.9973             | 0.997              | 0.9903              | 0.9953             | 0.9965             | 0.9929           | 0.9978             | 0.9981            | 0.9907             | 0.9961             |
| Absolute Sum of Squares     | 0.007459           | 0.07658            | 0.05273           | 0.03551            | 0.04133            | 0.01095             | 0.01183            | 0.05459            | 0.03355          | 0.06459            | 0.03577           | 0.02853            | 0.02853            |
| Stp                         | 0.02731            | 0.08761            | 0.07262           | 0.08959            | 0.06429            | 0.0331              | 0.1088             | 0.07389            | 0.05792          | 0.1407             | 0.08037           | 0.09981            | 0.05341            |
| Number of points            |                    |                    |                   |                    |                    |                     |                    |                    |                  |                    |                   |                    |                    |
| # of X values               | 18                 | 18                 | 18                | 18                 | 18                 | 18                  | 18                 | 18                 | 18               | 18                 | 18                | 18                 | 18                 |
| # Y values analyzed         | 12                 | 12                 | 12                | 12                 | 12                 | 12                  | 12                 | 12                 | 12               | 12                 | 12                | 12                 | 12                 |

**C**

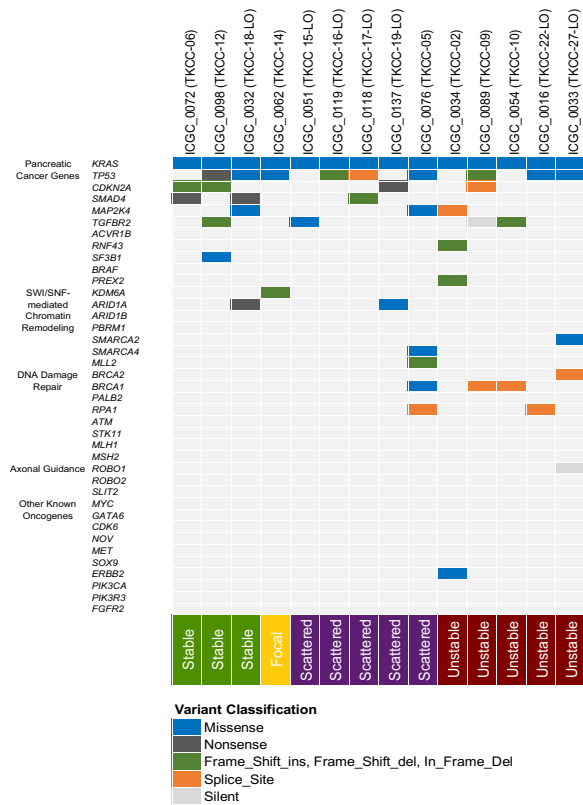

**D**

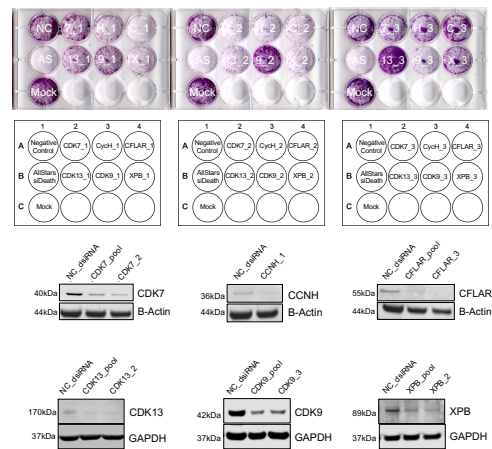

**E**

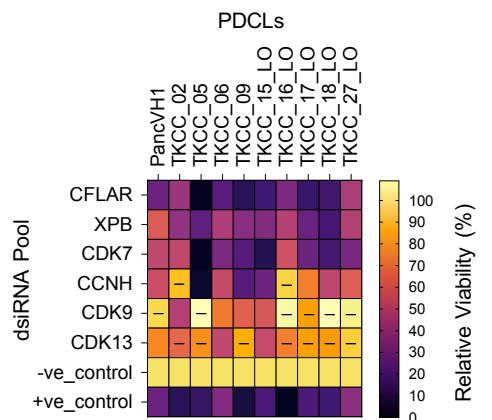

**Figure S4. Extended Data. A.** Brightfield images of 14 TKCC PDAC cell cultures: TKCC-02, TKCC-05, TKCC-06, TKCC-09, TKCC-10, TKCC-12, TKCC-14, TKCC-15-LO, TKCC-16-LO, TKCC-17-LO, TKCC-18-LO, TKCC-19-LO, TKCC-22-LO, TKCC-27-LO. **B.** TKCC PDCLs proliferation assay results; doubling times of 12 PDCLs, and HPNE. **C.** Oncoprint of TKCC PDCLs compiled from mutation annotation format (MAF) files and structural variant genomic subtyping from Waddell et al. 2015 and Chou et al. 2017. **D.** PancVH1 colony assay to assess phenotype of knockdown of deconvoluted dsRNAs to CDK7, CCNH, CFLAR, CDK13, CDK9, XPB; 3 individual dsRNAs (1-3)/target (methods for details); negative control dsRNA (NC), positive control AllStars siDeath (AS); Mock-liposome; 7-day assay; 12-well plate treatment schematic (below). Immunoblot confirmation to assess target engagement at 48hr post-knockdown of both dsRNA pool and individual dsRNA per target with greatest phenotypic effect on survival. **E.** Heatmap of relative viability of dsRNA pooled knockdown to CFLAR, XPB, CDK7, CDK9, CDK13, CCNH in 10 PDCLs (9 TKCC PDCLs and PancVH1); 120 hr assay, dsRNA pooled targeted knockdowns were statistically significant ( $P$ -value $<0.05$ ) versus negative control dsRNA (-ve) via one-way ordinary ANOVA and Dunnett's post-test unless indicated by hash line (not significant); AllStars siDeath (+ve).
