# Supplementary material
Source: PubMed Central journal article supplement (PMC9481717)
Supplement: NIHMS1824688-supplement-5.pdf [file NIHMS1824688-supplement-5.pdf]

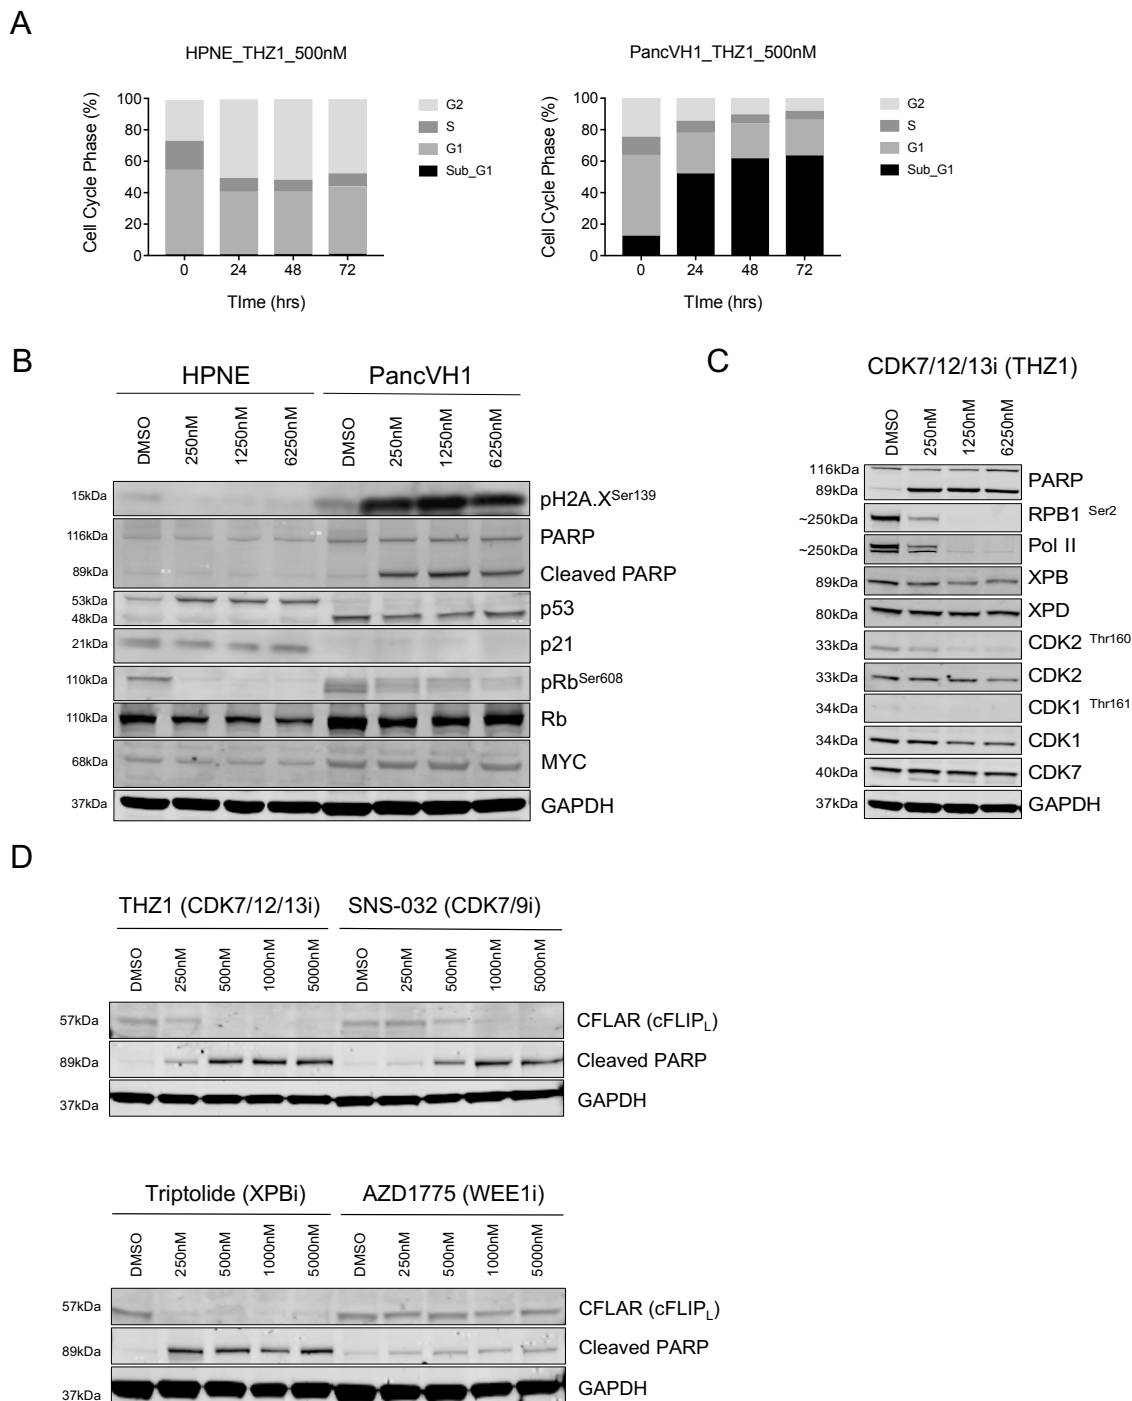

**Figure S5. Extended Data.** **A.** THZ1 initiates a cell death/apoptotic response at the G1/S transition in PancVH1, while initiating a G2 phase cell cycle arrest in HPNE cells; cell cycle analysis, time course post-treatment; bar graph of percentage of cells in subG1, G1, S, G2 phase assessed by DNA content. **B.** THZ1 induces DNA damage (pH2A.X<sup>Ser139</sup>) and apoptosis (cleaved PARP) in PancVH1 but not in HPNE cells; immunoblot of pH2A.X<sup>Ser139</sup>, PARP, p53, p21, pRb<sup>Ser608</sup>, RB, MYC, GAPDH loading control. **C.** THZ1 treatment shows a dose-dependent inhibition of phospho-substrates of CDK7: CDK1<sup>Thr161</sup>, CDK2<sup>Thr160</sup>, and RPB1<sup>Ser2</sup>, and cleavage of PARP; immunoblot to PARP, RPB1<sup>Ser2</sup>, RPB1/Pol II, XPB, XPD, CDK2<sup>Thr160</sup>, CDK2, CDK<sup>Thr161</sup>, CDK1, CDK7, GAPDH loading control. **D.** PancVH1 treatment with TFIH inhibitors THZ1, SNS-032, and Triptolide all show a dose-dependent reduction in CFLAR (cFLIP<sub>L</sub>) protein expression with a concomitant cleavage of PARP indicating a CFLAR-mediated shared mechanism of action; equipotent inhibitor AZD1775 to the WEE1 kinase; immunoblot to CFLAR, PARP, GAPDH loading control.
