# Supplementary material
Source: PubMed Central journal article supplement (PMC9481717)
Supplement: NIHMS1824688-supplement-7.pdf [file NIHMS1824688-supplement-7.pdf]

**A**

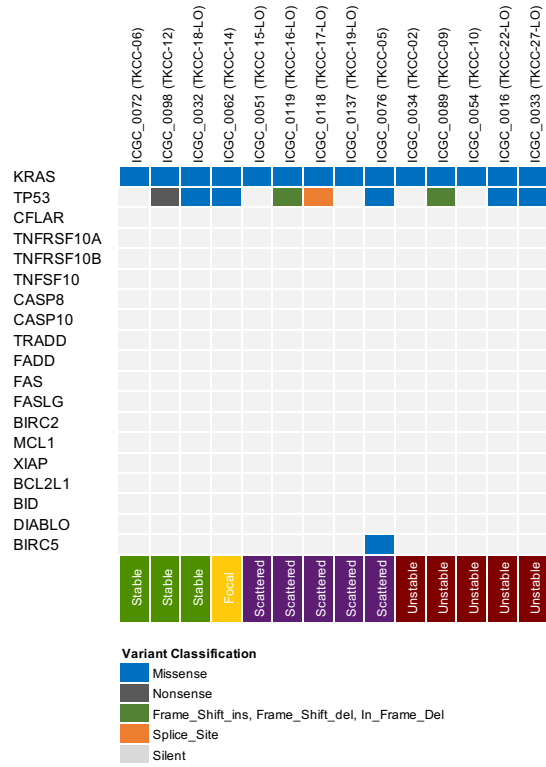

**B**

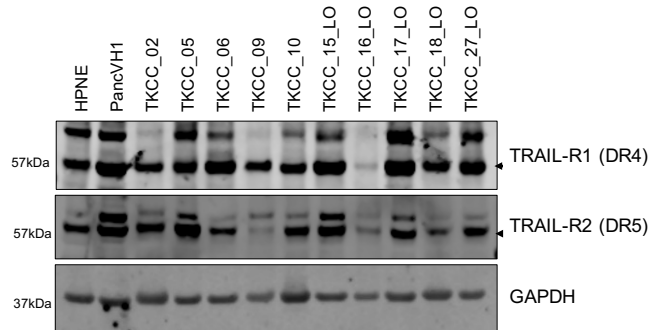

**Figure S7. Extended Data. A.** Extrinsic apoptosis pathway oncoprint of TKCC cell lines. **B.** Expression of TRAIL-R1 (DR4); Gene\_TNFRSF10A, TRAIL-R2 (DR5); Gene\_TNFRSF10B in 10 TKCC PDCLs, HPNE, and PancVH1; immunoblot probed with antibodies to TRAIL-R1 and TRAIL-R2; GAPDH loading control.
